# Supplementary material for: Zwitterionic liquid vs. ionic liquid analogue biomass pretreatment ability
Source: Royal Society of Chemistry journal article supplement (doi:10.1039/d4nj03379e), 2024-01-01
Supplement: d4nj03379e1.pdf [file d4nj03379e1.pdf]

Supporting information

## **A zwitterionic liquid vs an ionic liquid analogue upon biomass**

### **pretreatment ability**

Ayumi Hachisu<sup>†</sup>, Kenji Takahashi<sup>†</sup>, and Kosuke Kuroda<sup>†,¶,\*</sup>

<sup>†</sup>Faculty of Biological Science and Technology, Graduate School of Natural Science and Technology, Kanazawa University, Kakuma-machi, Kanazawa 920-1192, Japan

<sup>¶</sup>NanoMaterials Research Institute, Kanazawa University, Kakuma-machi, Kanazawa 920-1192, Japan

\*kkuroda@staff.kanazawa-u.ac.jp

Number of pages: 8

Number of Figures: 8

Number of Table: 1

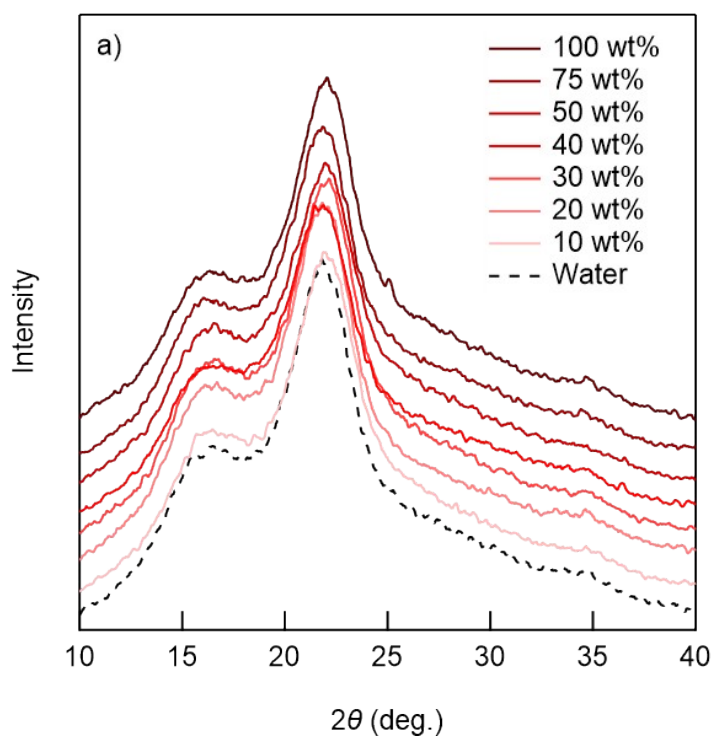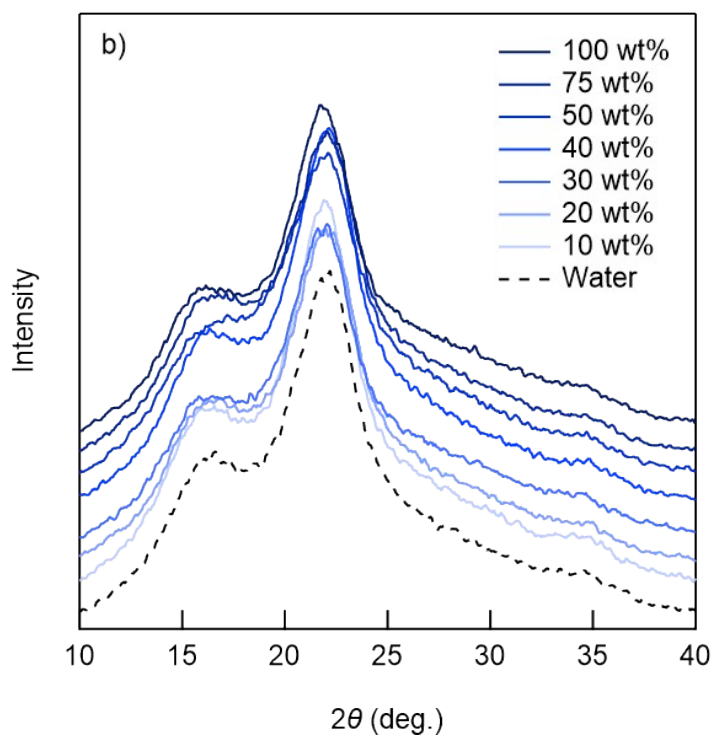

**Fig. S1** XRD patterns of bagasse pretreated by a) OE<sub>2</sub>imC<sub>3</sub>C and b) [C<sub>2</sub>mim]OAc at 50 °C.

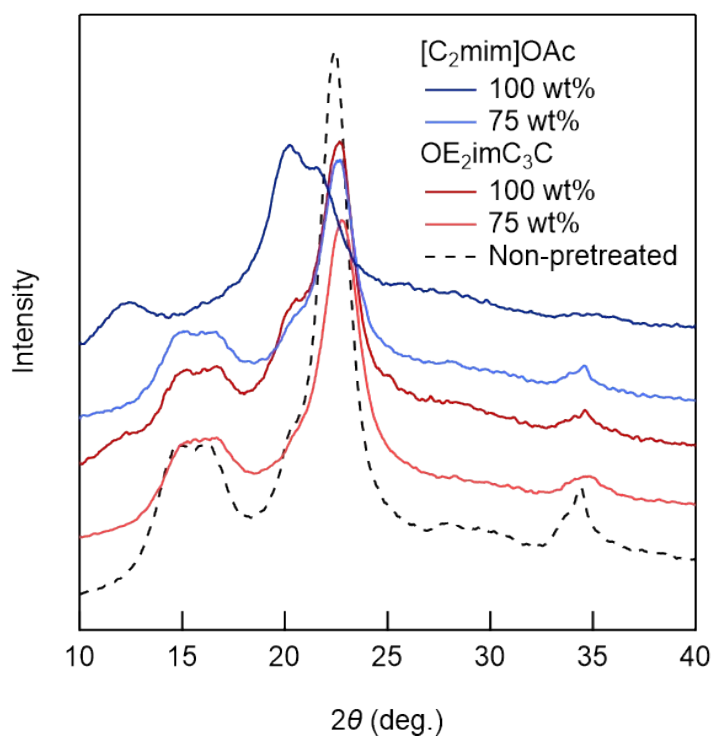

**Fig. S2** XRD patterns of Avicel pretreated by OE<sub>2</sub>imC<sub>3</sub>C and [C<sub>2</sub>mim]OAc at 50 °C.

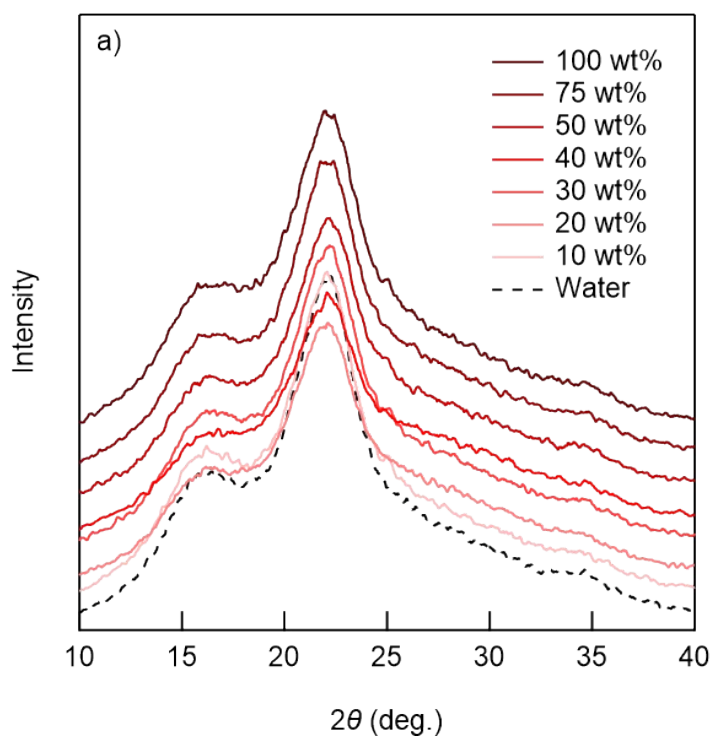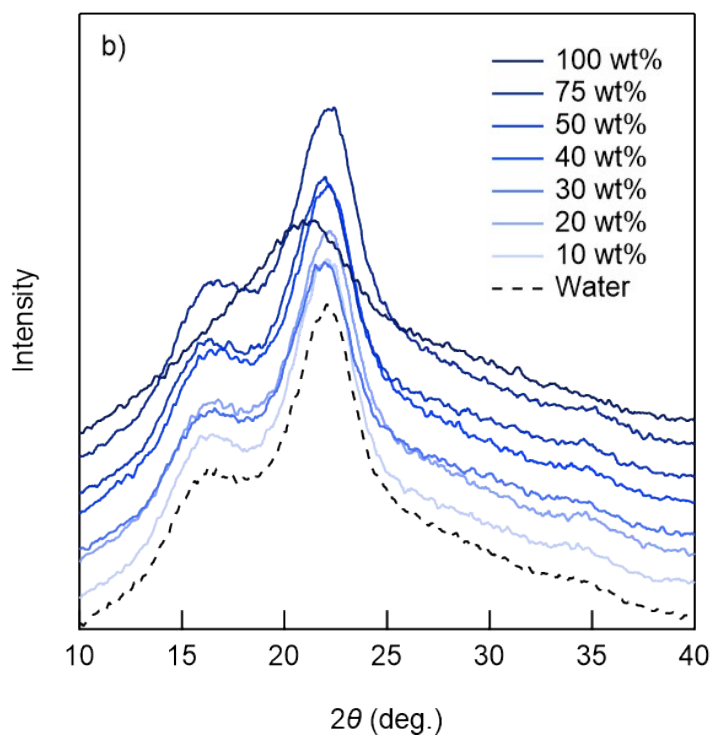

**Fig. S3** XRD patterns of bagasse pretreated by a) OE<sub>2</sub>imC<sub>3</sub>C and b) [C<sub>2</sub>mim]OAc at 90 °C.

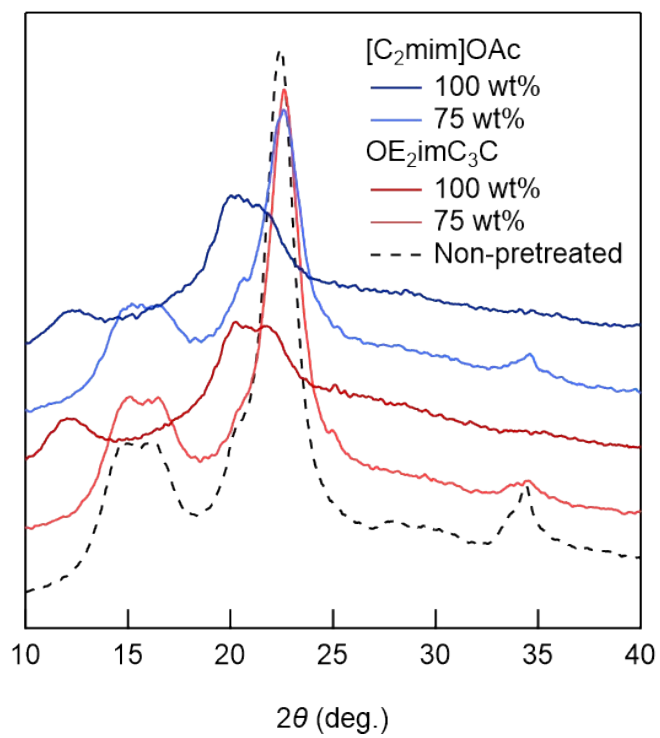

**Fig. S4** XRD patterns of Avicel pretreated by OE<sub>2</sub>imC<sub>3</sub>C and [C<sub>2</sub>mim]OAc at 90 °C.

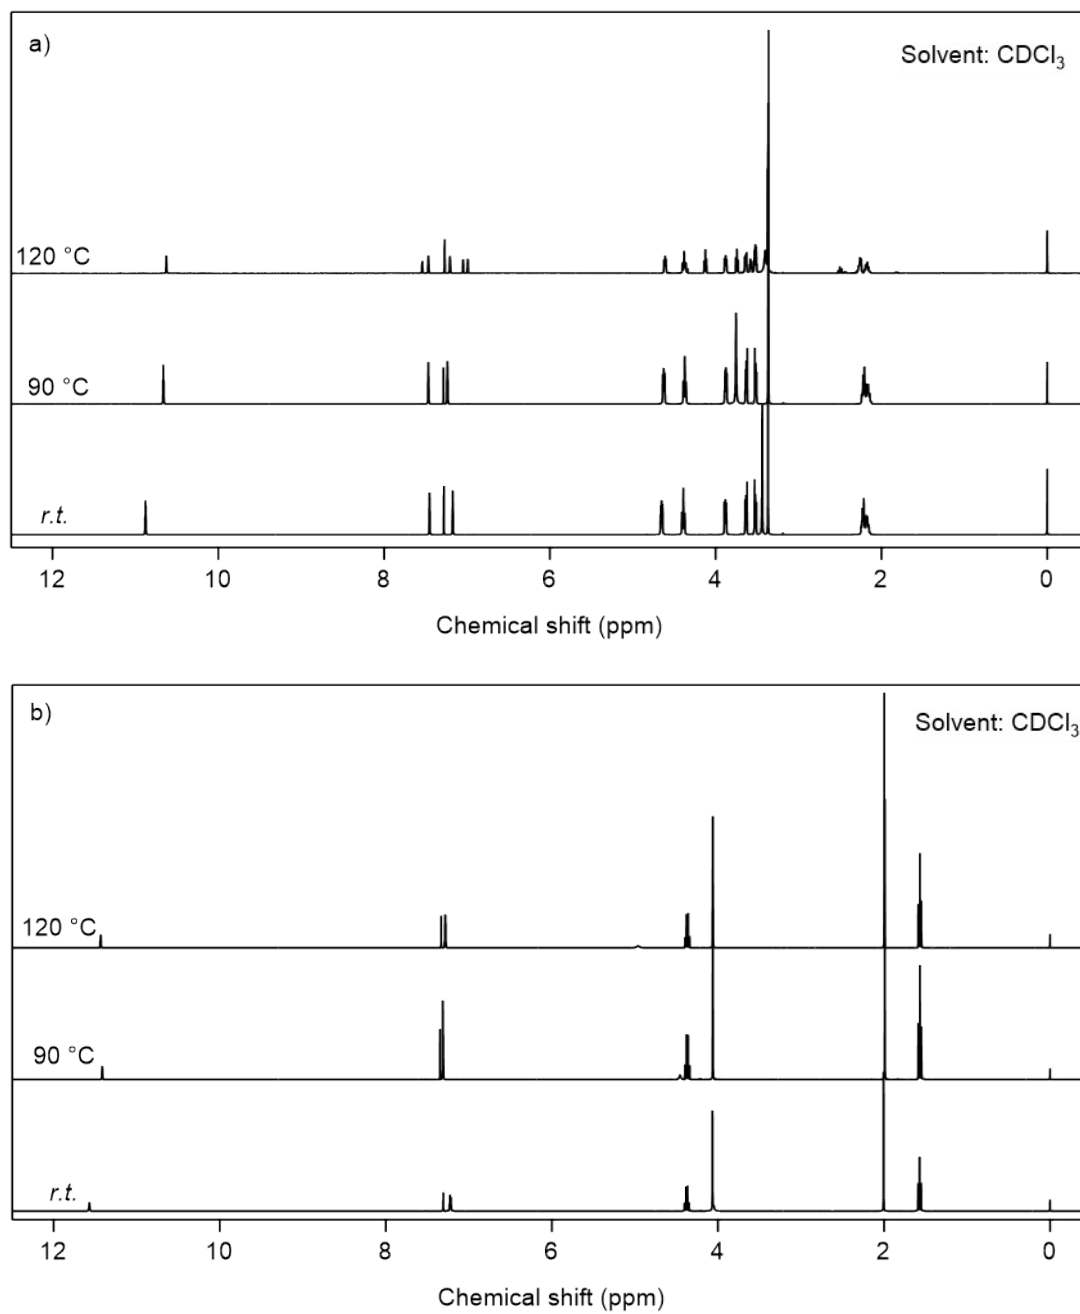

**Fig. S5** <sup>1</sup>H NMR spectra of a) OE<sub>2</sub>imC<sub>3</sub>C and b) [C<sub>2</sub>mim]OAc after pretreatment for 24 h at 90, 120 °C.

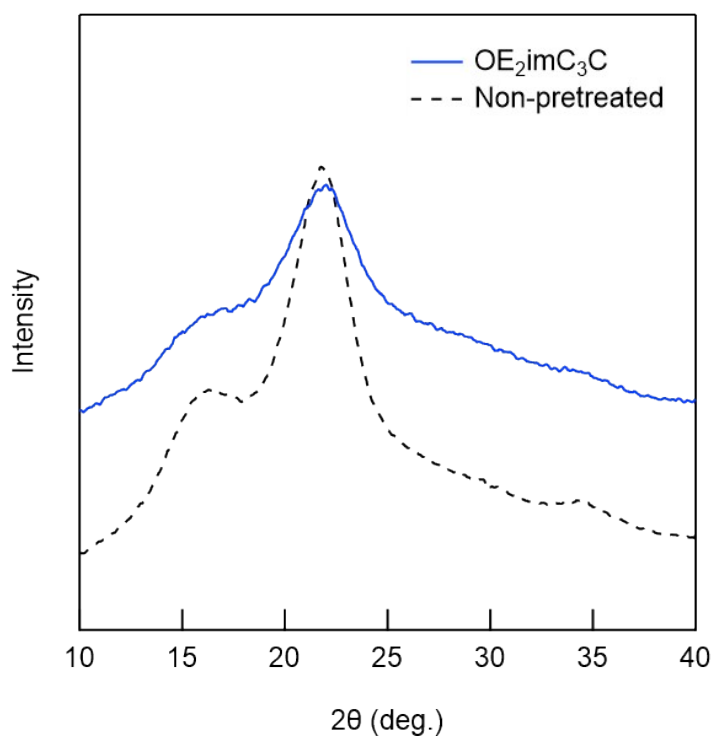

**Fig. S6** XRD patterns of bagasse pretreated by OE<sub>2</sub>imC<sub>3</sub>C at 120 °C.

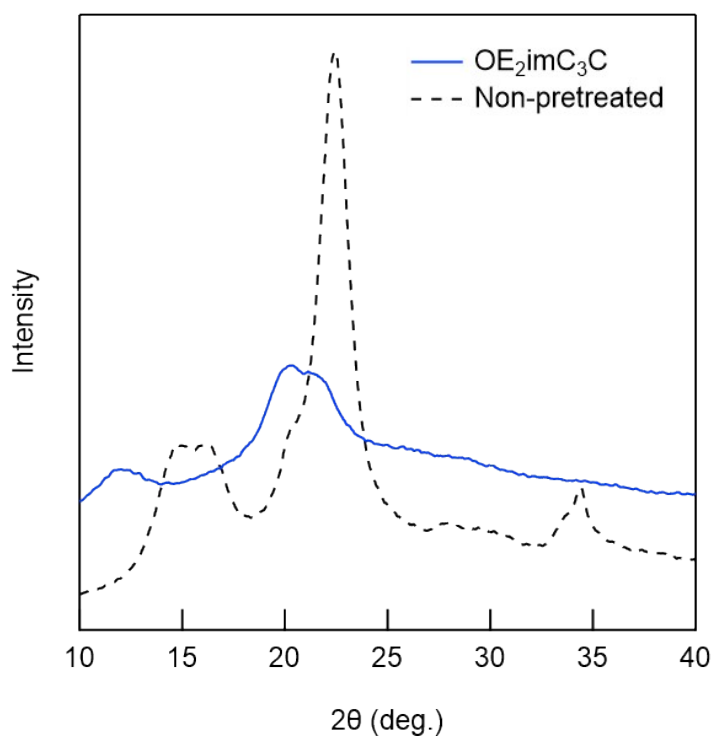

**Fig. S7** XRD patterns of Avicel pretreated by OE<sub>2</sub>imC<sub>3</sub>C at 120 °C.

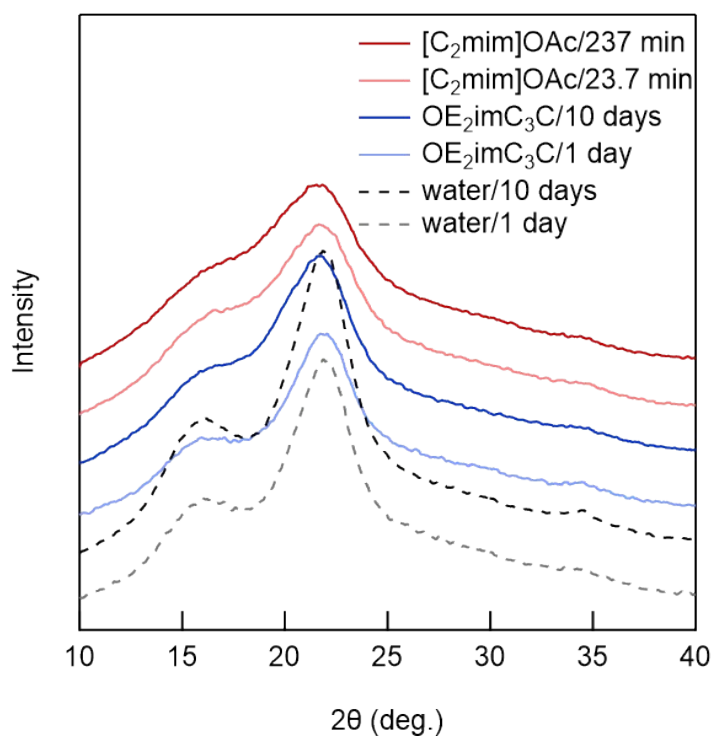

**Fig. S8** XRD patterns of bagasse pretreated by OE<sub>2</sub>imC<sub>3</sub>C and [C<sub>2</sub>mim]OAc at 90 °C.

**Table S1** Calculated viscosity of OE<sub>2</sub>imC<sub>3</sub>C and [C<sub>2</sub>mim]OAc at 90 °C.

|                                    | Viscosity<br>(mPa s)* |
|------------------------------------|-----------------------|
| OE <sub>2</sub> imC <sub>3</sub> C | 510                   |
| [C <sub>2</sub> mim]OAc            | 8.4                   |

\* The original data were reported in the literature.<sup>1</sup>

#### Reference

1. R. Kadokawa, T. Endo, Y. Yasaka, K. Ninomiya, K. Takahashi and K. Kuroda, *ACS Sustainable Chemistry & Engineering*, 2021, **9**, 8686-8691.
